# Supplementary material for: Institutional Investor Attention, Agency Conflicts, and the Cost of Debt
Source: Atypon-hosted journal article supplement (doi:10.1287/mnsc.2022.4593), 2022-12-01
Supplement: mnsc.2022.4593.sm1.pdf [file mnsc.2022.4593.sm1.pdf]

## **Online Appendix**

**“Institutional Investor Attention, Agency Conflicts, and the Cost of Debt”**

April 2022

**Table A1.** Bond Rating Numerical Conversion

| Conversion Number | Moody's Ratings | S&P Ratings |
|-------------------|-----------------|-------------|
| 23                | Aaa+            | AAA+        |
| 22                | Aaa             | AAA         |
| 21                | Aa1             | AA+         |
| 20                | Aa2             | AA          |
| 19                | Aa3             | AA-         |
| 18                | A1              | A+          |
| 17                | A2              | A           |
| 16                | A3              | A-          |
| 15                | Baa1            | BBB+        |
| 14                | Baa2            | BBB         |
| 13                | Baa3            | BBB-        |
| 12                | Ba1             | BB+         |
| 11                | Ba2             | BB          |
| 10                | Ba3             | BB-         |
| 9                 | B1              | B+          |
| 8                 | B2              | B           |
| 7                 | B3              | B-          |
| 6                 | Caa1            | CCC+        |
| 5                 | Caa2            | CCC         |
| 4                 | Caa3            | CCC-        |
| 3                 | Ca              | CC          |
| 2                 | C               | C           |
| 1                 | D               | D           |

*Notes.* This table provides bond rating conversion using Moody's and S&P ratings. The data cover the 1993–2015 period.

**Table A2.** Descriptive Statistics and Robustness*Panel A: Summary Statistics*

|                       | Mean   | Median | Standard<br>Deviation | 25th<br>Percentile | 75th<br>Percentile |
|-----------------------|--------|--------|-----------------------|--------------------|--------------------|
| Advertising Intensity | 0.135  | 0.076  | 0.167                 | 0.034              | 0.169              |
| Analyst Following     | 13.154 | 12.000 | 7.559                 | 7.000              | 18.000             |
| Big 4 Auditor         | 0.984  | 1.000  | 0.127                 | 1.000              | 1.000              |
| EIndex                | 3.954  | 4.000  | 1.125                 | 3.000              | 5.000              |
| CEO Pay Mix           | 0.572  | 0.624  | 0.234                 | 0.418              | 0.760              |
| Dedicated IO          | 0.075  | 0.051  | 0.091                 | 0.000              | 0.111              |
| Quasi-Indexer IO      | 0.465  | 0.477  | 0.188                 | 0.320              | 0.608              |
| Transient IO          | 0.161  | 0.144  | 0.097                 | 0.087              | 0.214              |
| Long-Term IO          | 0.184  | 0.170  | 0.092                 | 0.117              | 0.246              |
| Short-Term IO         | 0.296  | 0.285  | 0.131                 | 0.200              | 0.381              |

*Notes.* Panel A provides descriptive statistics for the variables used in Panel B below. The overall sample contains 21,345 firm-quarter observations from 1,094 firms over the 1993–2015 period.

Panel B. Robustness

|                          | Advertising Intensity | Analyst Following   | Big 4 Auditor       | EIndex              | CEO Pay Mix         | Hoberg & Phillips   | Excluding Crisis    | Bushee IO             | IO Horizon            |
|--------------------------|-----------------------|---------------------|---------------------|---------------------|---------------------|---------------------|---------------------|-----------------------|-----------------------|
|                          | (1)                   | (2)                 | (3)                 | (4)                 | (5)                 | (6)                 | (7)                 | (8)                   | (9)                   |
| Distraction              | 0.255***<br>(3.212)   | 0.285***<br>(5.318) | 0.255***<br>(4.813) | 0.281***<br>(3.506) | 0.277***<br>(4.835) | 0.265***<br>(4.600) | 0.262***<br>(4.297) | 0.257***<br>(4.782)   | 0.246***<br>(4.638)   |
| Advertising Intensity    | -0.214<br>(-1.568)    |                     |                     |                     |                     |                     |                     |                       |                       |
| Analyst Following        |                       | -0.033*<br>(-1.685) |                     |                     |                     |                     |                     |                       |                       |
| Big 4 Auditor            |                       |                     | 0.048<br>(0.866)    |                     |                     |                     |                     |                       |                       |
| EIndex                   |                       |                     |                     | 0.019<br>(1.146)    |                     |                     |                     |                       |                       |
| CEO Pay Mix              |                       |                     |                     |                     | 0.013<br>(0.362)    |                     |                     |                       |                       |
| Dedicated IO             |                       |                     |                     |                     |                     |                     |                     | -0.186<br>(-1.458)    |                       |
| Quasi-Indexer IO         |                       |                     |                     |                     |                     |                     |                     | -0.275***<br>(-2.610) |                       |
| Transient IO             |                       |                     |                     |                     |                     |                     |                     | -0.469***<br>(-4.196) |                       |
| Long-Term IO             |                       |                     |                     |                     |                     |                     |                     |                       | -0.081<br>(-0.711)    |
| Short-Term IO            |                       |                     |                     |                     |                     |                     |                     |                       | -0.405***<br>(-5.269) |
| Firm Controls            | Yes                   | Yes                 | Yes                 | Yes                 | Yes                 | Yes                 | Yes                 | Yes                   | Yes                   |
| Industry × Quarter FE    | Yes                   | Yes                 | Yes                 | Yes                 | Yes                 | No                  | Yes                 | Yes                   | Yes                   |
| HP Industry × Quarter FE | No                    | No                  | No                  | No                  | No                  | Yes                 | No                  | No                    | No                    |
| Firm FE                  | Yes                   | Yes                 | Yes                 | Yes                 | Yes                 | Yes                 | Yes                 | Yes                   | Yes                   |
| Observations             | 8,180                 | 18,628              | 21,319              | 8,677               | 16,905              | 20,953              | 19,259              | 21,333                | 21,333                |
| Adjusted R-Squared       | 0.744                 | 0.762               | 0.743               | 0.665               | 0.756               | 0.747               | 0.743               | 0.744                 | 0.743                 |

Notes. Variable definitions are provided in the manuscript Table 1. This table provides coefficient estimates from regressing the log of bond yield spreads on shareholder distraction using alternative specifications. The data cover the 1993–2015 period. Except Model 6, all specifications include firm and industry × quarter fixed effects based on Fama–French 12-industry classification codes. HP Industry × Quarter FE is computed based on the Hoberg and Phillips industry classifications. *t*-statistics based on standard errors adjusted for clustering by firm are in parentheses. \*\*\**p*<0.01, \*\**p*<0.05, \**p*<0.10

**Table A3.** Excluding Firm-Quarters with Acquisitions

| Dependent Variable = Idiosyncratic Volatility |                       |
|-----------------------------------------------|-----------------------|
| Distraction                                   | 0.006***<br>(3.913)   |
| Firm Size                                     | -0.001***<br>(-2.387) |
| Leverage                                      | 0.010***<br>(6.059)   |
| Performance                                   | -0.003***<br>(-4.063) |
| ROE Volatility                                | 0.000<br>(0.197)      |
| Market-to-Book                                | -0.000<br>(-0.303)    |
| Dividend Dummy                                | -0.002***<br>(-4.288) |
| Firm Age                                      | -0.003***<br>(-2.728) |
| Diversification                               | -0.000<br>(-0.061)    |
| Tangibility                                   | -0.004*<br>(-1.873)   |
| Industry $\times$ Quarter FE                  | Yes                   |
| Firm FE                                       | Yes                   |
| Observations                                  | 10,085                |
| Adj. R-squared                                | 0.669                 |

*Notes.* This table provides coefficient estimates from regressing idiosyncratic risk on institutional shareholder distraction and several controls. ROE volatility is the variance of quarterly return-on-equity over three years, Dividend Dummy is an indicator variable that equals 1 if the firm pays dividend in a given quarter, Firm Age is the number of years since the stock inclusion in the CRSP database, and Diversification is an indicator variable that equals 1 if a firm operates in multiple segments in a given quarter. The data cover the 1993–2015 period. *t*-statistics based on standard errors adjusted for clustering by firm are in parentheses. All specifications include firm and industry  $\times$  quarter fixed effects. Industry dummies are based on Fama–French 12-industry classification codes.

\*\*\* $p < 0.01$ , \*\* $p < 0.05$ , \* $p < 0.10$ .

**Table A4.** Distraction, Credit Rating Downgrades, and Cost of Debt

| Panel A: Rating Downgrades |                       | Panel B: Cost of Debt   |                       |
|----------------------------|-----------------------|-------------------------|-----------------------|
| Distraction                | 0.015<br>(0.550)      | Distraction             | 0.020***<br>(4.613)   |
| Firm Size                  | 0.018<br>(1.145)      | Downgrade Dummy         | 0.102***<br>(5.317)   |
| Market to Book             | -0.001<br>(-1.409)    | Distraction × Downgrade | 0.010<br>(0.917)      |
| Interest Coverage Ratio    | -0.000<br>(-0.309)    | Firm Size               | -0.056**<br>(-2.202)  |
| Operating Margin           | -0.148***<br>(-2.849) | Leverage                | 0.518***<br>(5.319)   |
| Total Debt Leverage        | 0.058<br>(0.899)      | Performance             | -3.169***<br>(-7.476) |
| Cash Ratio                 | -0.522***<br>(-4.372) | Sales Growth            | 0.045**<br>(1.962)    |
| Tangibility                | 0.386***<br>(3.063)   | Cash Flow Volatility    | 0.285<br>(0.513)      |
| Dividend Payer             | 0.029*<br>(1.867)     | Market-to-Book          | -0.003**<br>(-2.433)  |
| R&D                        | -0.061<br>(-0.689)    | Credit Rating           | -0.035***<br>(-3.527) |
| Capex                      | -0.065<br>(-0.156)    | Bond Maturity           | 0.009***<br>(3.327)   |
| Retained Earning           | 0.023<br>(0.652)      | Bond Age                | 0.031***<br>(6.939)   |
| Idiosyncratic Risk         | 2.267***<br>(3.972)   | High Yield              | 0.371***<br>(9.277)   |
| Systemic Risk              | -0.004<br>(-0.415)    | Callability             | 0.134***<br>(4.419)   |
|                            |                       | Institutional Ownership | -0.381***<br>(-5.036) |
| Industry × Quarter FE      | Yes                   | Industry × Quarter FE   | Yes                   |
| Firm FE                    | Yes                   | Firm FE                 | Yes                   |
| Observations               | 19,730                | Observations            | 21,345                |
| Adj. R-squared             | 0.184                 | Adj. R-squared          | 0.745                 |

*Notes.* This table provides coefficient estimates from regressing the rating downgrade indicator on institutional shareholder distraction (Panel A) and from regressing the cost of debt on distraction and its interactions with rating downgrade dummies (Panel B). Downgrade is a dummy variable that equals 1 if the firm's bond rating is downgraded across major rating categories (i.e. AA, A, BBB, BB, B, CCC etc.) in the subsequent four quarters. Motivated by Alp (2013), we include firm size, market-to-book ratio, interest coverage ratio, operating margin, total debt leverage, cash ratio, tangibility, dividend payer indicator, research and development (R&D), capital expenditures, retained earnings, idiosyncratic risk, and systemic risk as control variables.<sup>1</sup> The data cover the 1993–2015 period. *t*-statistics based on standard errors adjusted for clustering by firm are in parentheses. All specifications include firm and industry × quarter fixed effects. Industry dummies are based on Fama–French 12-industry classification codes.

<sup>1</sup> Alp A (2013) Structural shifts in credit rating standards. *Journal of Finance* 68(6): 2435-2470.
